# Supplementary material for: A suspect screening analysis for contaminants of emerging concern in municipal wastewater and surface water using liquid–liquid extraction and stir bar sorptive extraction
Source: Royal Society of Chemistry journal article supplement (doi:10.1039/d0ay01179g), 2020-01-01
Supplement: d0ay01179g1.pdf [file d0ay01179g1.pdf]

**Supplemental Information for A Suspect Screening Analysis for Contaminants of  
Emerging Concern in Municipal Wastewater and Surface Water Using Liquid-Liquid  
Extraction and Stir Bar Sorptive Extraction.**

**Additional Materials and Methods Information:**

All the analytical standards, including surrogates, calibration mix, internal standards and hexachlorobenzene (cat # 32231) were purchased from Restek Corp. (Bellefonte, PA, USA). The surrogate standards include the Acid Surrogate Standard Mix (cat # 31003), Base Neutral Surrogate Standard Mix (cat # 31082) and QuEChERS Internal Standard Mix for GC-MS Analysis (cat # 33267). These were chosen because they represent environmentally relevant compound classes and provide a range of acidic and basic compounds. SV Internal Standard Mix (cat # 31206), a solution of 6 deuterated polycyclic aromatic hydrocarbons, was used because of its compliance with the US EPA Method 8270D for analysis of semi-volatile organic pollutants by GC-MS. 8270 Megamix (cat# 31850) was utilized as an additional calibration and target mix of 76 common environmental pollutants. Any sample analytes found in 8270 Megamix could then be quantified and it could also serve for single point semi-quantification purposes.

Analytical grade dichloromethane, methanol and acetonitrile were purchased from Avantor (Center Valley, PA, USA), ChemPure Brand Chemicals (Ann Arbor, MI, USA) and Avantor respectively. The sodium sulfate and sodium chloride were supplied by Avantor and VWR (West Chester, PA, USA). The ultrapure water was delivered by the lab system Millipore Milli-Q Academic Ultrapure Water System (Billerica, MA, USA).

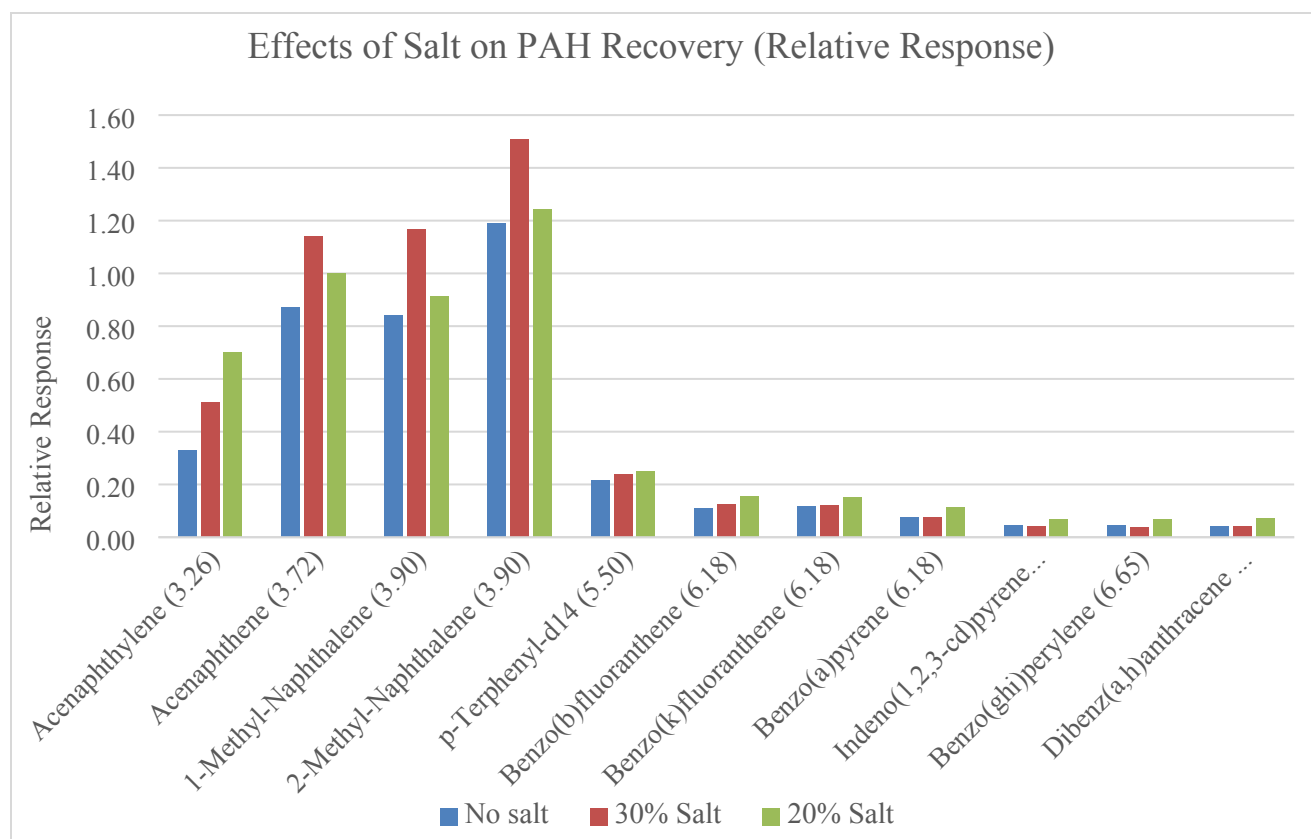

**Figure S1:** Graph showing the relative response of PAHs as a function of the NaCl concentration during extraction. The logKow values are in parenthesis next to the analyte name.

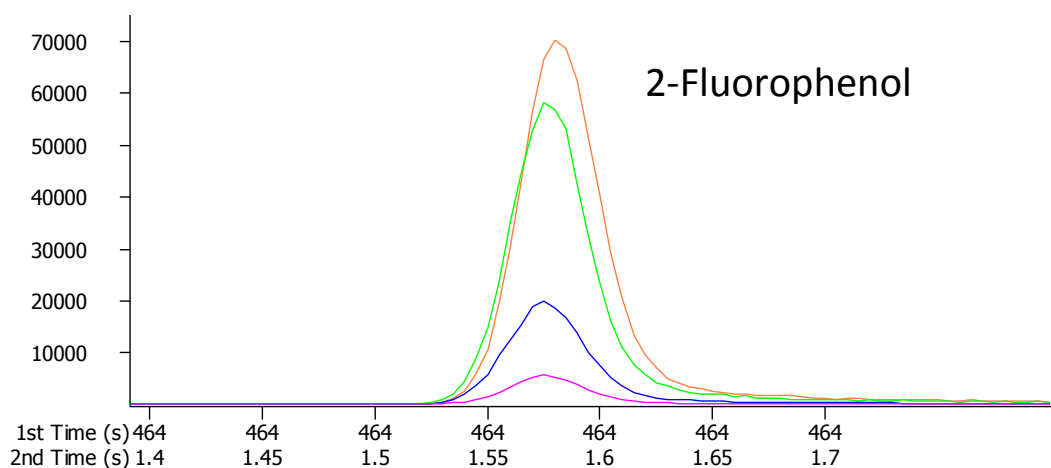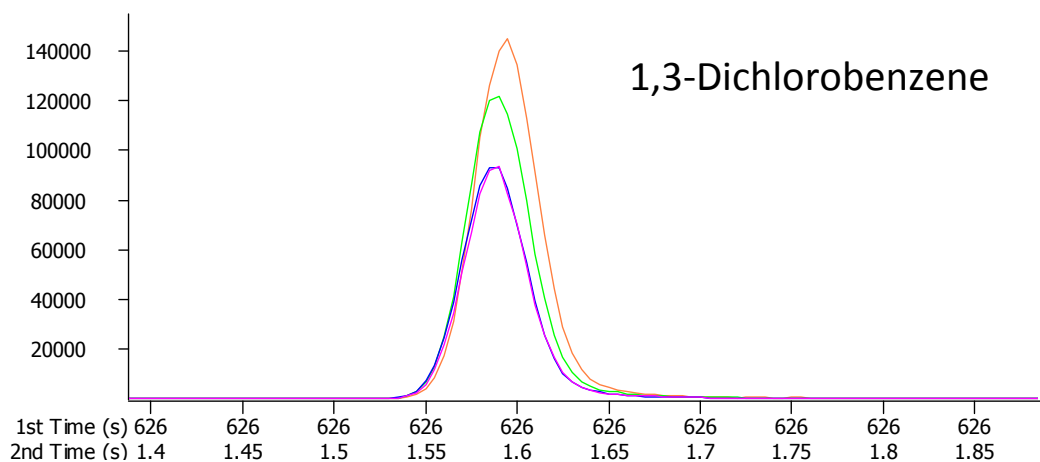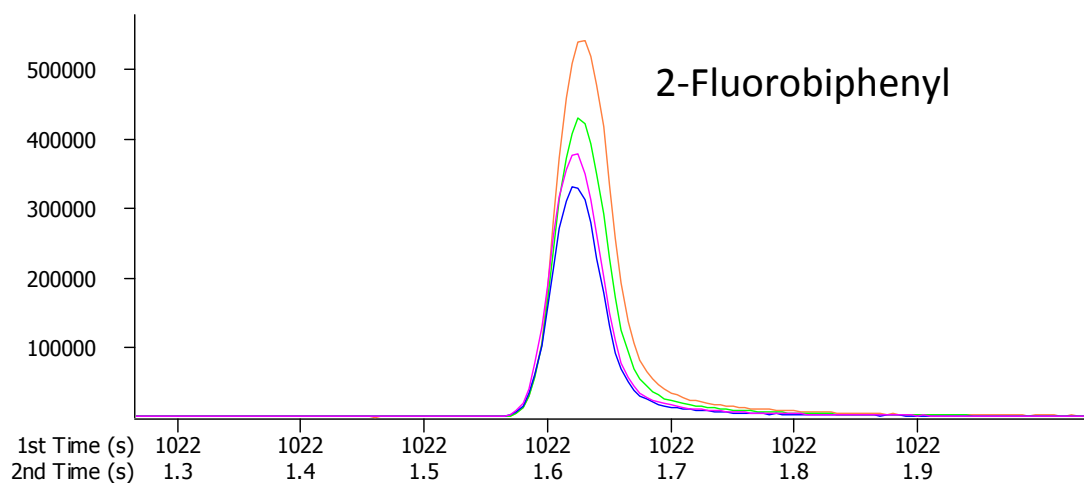

**Figure S2:** Extracted Ion Chromatograms showing the CIS trapping temperature effects on peak area. Orange represents -100 °C, green is -80 °C, blue is -50 °C, and pink is -20 °C.

**Table S.1.** Percent Recoveries of sample method blanks

|                                                               | Compound                                         | LLE WW<br>Method<br>Blank | LLE Spring<br>Creek<br>Method<br>Blank | SBSE WW<br>Method<br>Blank | SBSE Spring<br>Creek<br>Method<br>Blank |
|---------------------------------------------------------------|--------------------------------------------------|---------------------------|----------------------------------------|----------------------------|-----------------------------------------|
|                                                               |                                                  | %R                        | %R                                     | %R                         | %R                                      |
| Acid Surrogate<br>Standard Mix<br>(3/90 SOW)                  | 2-Fluorophenol                                   | 53                        | 29                                     | ND                         | ND                                      |
|                                                               | Phenol-d6                                        | 20                        | ND                                     | ND                         | ND                                      |
|                                                               | 2-Chlorophenol-d-4                               | 66                        | 56                                     | ND                         | ND                                      |
|                                                               | 2,4,6-Tribromophenol                             | 28                        | 88                                     | ND                         | ND                                      |
| Base Neutral<br>Surrogate<br>Standard Mix<br>(3/90 SOW)       | 1,2- Dichlorobenzene-d4                          | 62                        | 145                                    | 82                         | 109                                     |
|                                                               | 2-Fluorobiphenyl                                 | 53                        | 66                                     | 81                         | 95                                      |
|                                                               | Nitrobenzene-d5                                  | 63                        | 94                                     | 47                         | ND                                      |
|                                                               | p-Terphenyl-d14                                  | 80                        | 113                                    | 73                         | 100                                     |
| QuEChERS<br>Internal<br>Standard Mix<br>for GC-MS<br>Analysis | PCB 18 = 1,1'-Biphenyl,<br>2,2',5-trichloro-     | 80                        | 99                                     | 100                        | 127                                     |
|                                                               | PCB 28 =1,1'-Biphenyl,<br>2,4,4'-trichloro-      | 80                        | 109                                    | 85                         | 114                                     |
|                                                               | PCB 52 =1,1'-Biphenyl,<br>2,2',5,5'-tetrachloro- | 87                        | 93                                     | 97                         | 121                                     |
|                                                               | Triphenylmethane                                 | 93                        | 95                                     | 88                         | 123                                     |
|                                                               | Triphenylphosphate                               | 88                        | 68                                     | NLR                        | NLR                                     |
|                                                               | Tris-(1,3-dichloro<br>isopropyl)phosphate        | 92                        | 70                                     | NLR                        | NLR                                     |
|                                                               |                                                  |                           |                                        |                            |                                         |

LLE samples (n=2), SBSE (n=1). ND, non-detected. NLR, non-linear response.

US EPA Comptox Chemistry Dashboard lists searched:

EPA|ENDOCRINE: Endocrine Disruptor Screening Program (EDSP) Universe of Chemicals  
WATER|NORMAN: French Monitoring List

DRUGS|NORMAN: Pharmaceutical List with EU, Swiss, US Consumption Data  
 WATER|NORMAN: Wastewater Suspect List based on Swedish Product Data  
 PESTICIDES|EPA: Pesticide Chemical Search Database

**Table S.2.** Discovery compounds from the wastewater and spring creek samples.

| Compound                     | Similarity | Reverse | Type                     |
|------------------------------|------------|---------|--------------------------|
| 2-Butanol                    | 816        | 957     | PCP-flavorant, fragrance |
| Dimenhydrinate               | 939        | 939     | Drug-antiemetic          |
| Lidocaine                    | 904        | 904     | Drug-anesthetic          |
| Diphenyl sulfone             | 936        | 936     | Manufacturing-colorant   |
| Doxepin                      | 952        | 952     | Drug-antidepressant      |
| 2-(methylthio)-benzothiazole | 955        | 958     | Consumer product         |
| Crotamiton                   | 933        | 933     | Drug-antiparasitic       |
| Amitriptyline                | 971        | 971     | Drug-antidepressant      |
| Venlafaxine                  | 943        | 947     | Drug-antidepressant      |
| 3,4-Dichloro-benzenamine     | 953        | 955     | Herbicide precursor      |
| Tramadol                     | 866        | 866     | Drug-analgesic           |
| Citalopram                   | 915        | 915     | Drug-antidepressant      |
| Bupropion                    | 899        | 904     | Drug-antidepressant      |
| Methadone                    | 917        | 917     | Drug-opioid              |
| Maltol                       | 952        | 955     | PCP-flavorant            |
| Musk ketone                  | 932        | 941     | PCP- fragrance           |
| Propofol                     | 927        | 929     | Drug-anesthetic          |
| Triclosan                    | 878        | 896     | PCP-Antibacterial        |
| Oxybenzone                   | 896        | 896     | PCP-sunscreen            |
| Levomenthol                  | 957        | 957     | Drug-anesthetic          |
| Thymol                       | 742        | 771     | PCP-Antibacterial        |
| Benzophenone                 | 952        | 952     | PCP-sunscreen            |
| Eucalyptol                   | 933        | 933     | PCP-fragrance            |
| Butylated Hydroxytoluene     | 889        | 890     | PCP- body wash, makeup   |
| Benzothiazole                | 926        | 945     | PCP-fragrance            |
| Cedrol                       | 861        | 862     | PCP- emollient           |
| Caffeine                     | 952        | 952     | PCP-eye cream, stimulant |
| Homosalate                   | 917        | 922     | PCP-sunscreen            |
| Benadryl                     | 911        | 928     | Drug-antihistamine       |
| Carbamazepine                | 805        | 860     | Drug-anticonvulsant      |
| Ibuprofen                    | 791        | 856     | Drug-analgesic           |
| Atrazine                     | 845        | 846     | Pesticide                |

PCP, personal care product. Consumer product is the label on the EPA Comptox Database when the descriptor is not clear about the use. Similarity-number from the NIST search algorithm that defines how well the peak matches the library match using all masses, between 0-999. Reverse-

number from NIST search algorithm defines how well the peak matches the library using masses in the database, between 0-999.<sup>1</sup>

1 Leco Corporation, *ChromaTOF® Software Instruction Manual*, 2012.
